# Supplementary material
Source: Springer Nature journal article supplement (https://www.springermedizin.de/resource/supplementary/12943_2010_700_MOESM3_ESM.pdf/9554612)

**A** NB-hypo signature (OS)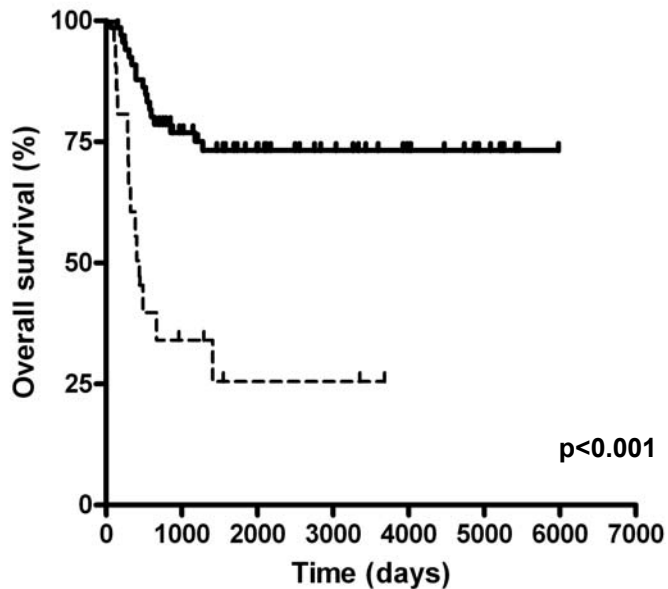**B** NB-hypo signature (EFS)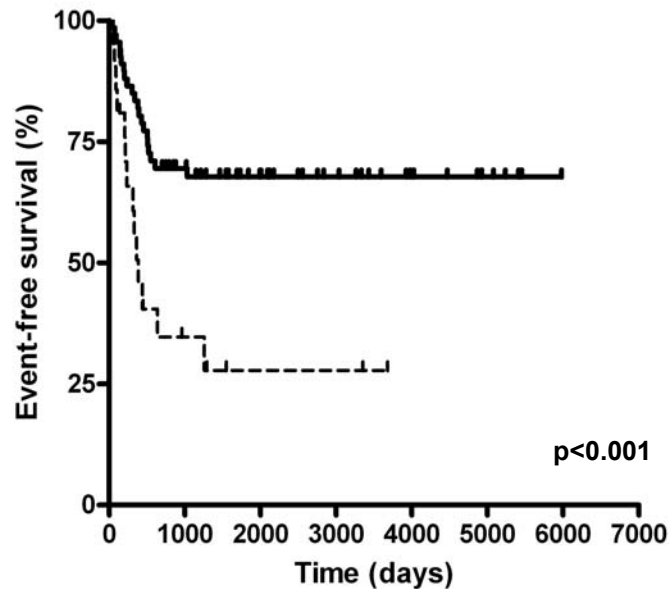**C** VEGF (OS)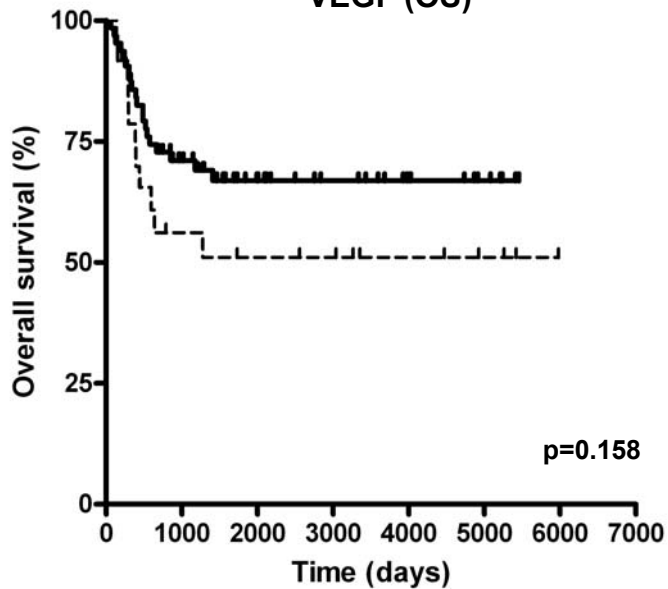**D** DC-hypo signature (OS)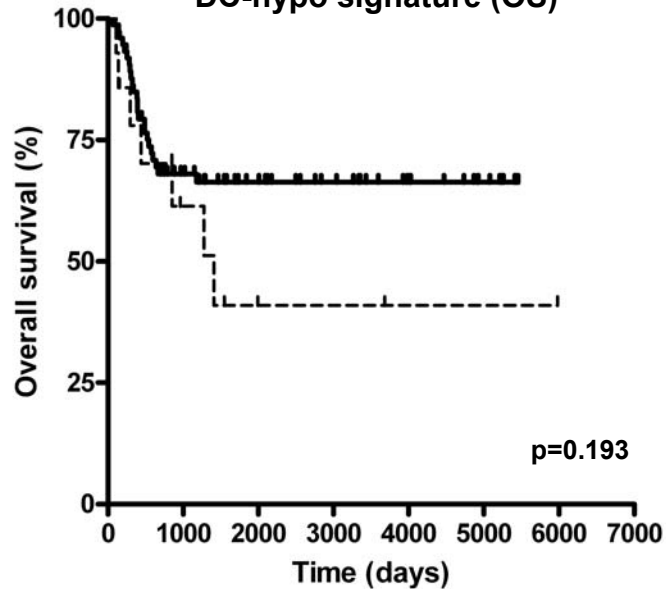

Supplement: MOESM3 [file 9554612]
